# Supplementary material for: Systematic unravelling of the biosynthesis of poly (L-diaminopropionic acid) in Streptomyces albulus PD-1
Source: PubMed Central journal article supplement (PMC4668381; doi:10.1038/srep17400), 2015-12-03
Supplement: srep17400-s1.pdf [file srep17400-s1.pdf]

## **Supplementary Materials**

### **Systematic unravelling of the biosynthesis of poly(L-diaminopropionic acid) in *Streptomyces albulus* PD-1**

Zhaoxian Xu<sup>1,2</sup>, Zhuzhen Sun<sup>1,2</sup>, Sha Li<sup>1,2</sup>, Zheng Xu<sup>1,2</sup>, Changhong Cao<sup>1,2</sup>, Zongqi Xu<sup>1,2</sup>, Xiaohai Feng<sup>1,2,\*</sup>, Hong Xu<sup>1,2,\*</sup>

<sup>1</sup>State Key Laboratory of Materials-Oriented Chemical Engineering, Nanjing, 211816, China

<sup>2</sup>College of Food Science and Light Industry, Nanjing Tech University, Nanjing, 211816, China

\*Corresponding Authors: Prof. Hong Xu and Prof. Xiaohai Feng, (Tel/Fax: +86-25-58139433; E-mail address: [xuh@njtech.edu.cn](mailto:xuh@njtech.edu.cn), [fengxiaohai@njtech.edu.cn](mailto:fengxiaohai@njtech.edu.cn) )

**Supplementary Table S1.** Strains and plasmids used in this study

| Strains or plasmids          | Descriptions                                                                     | Source             |
|------------------------------|----------------------------------------------------------------------------------|--------------------|
| <i>S. albulus</i> PD-1       | Producer of $\epsilon$ -PL and PDAP                                              | CGMCC No. M2011043 |
| <i>S. albulus</i> PD-3       | $\Delta pdaps :: Am^R$                                                           | This study         |
| <i>S. lividans</i> TK 24     | A model streptomycete used for PDAPs expression                                  | Lab stock          |
| <i>E. coli</i> DH 5 $\alpha$ | <i>E. coli</i> strain used for cloning                                           | Lab stock          |
| <i>E. coli</i> BL 21 (DE3)   | <i>E. coli</i> strain used for the expression A domain of PDAPs                  | Lab stock          |
| <i>E. coli</i> Origami (DE3) | <i>E. coli</i> strain used for expression of enzymes involved in L-DAP synthesis | Lab stock          |
| pET-28a                      | Plasmid used for the expression A domain of PDAPs                                | Lab stock          |
| pET-22b                      | Plasmid used for the expression of NjxA and NjxB                                 | Lab stock          |
| pKC1139                      | Used for the gene disruption of putative <i>pdaps</i>                            | Lab stock          |
| pKC1139- <i>pdap</i> '       | pKC1139 carrying homologous sequence of <i>pdaps</i>                             | This study         |
| pIJ86                        | Used for the heterologous expression of PDAPs in <i>S. lividans</i> TK24         | Lab stock          |

**Supplementary Table S2.** List of similarity between NjxA/NjxB and the reported proteins related to L-DAP biosynthesis

| Organism                                                    | Homologous gene (NjxA/NjxB) | Similarity (%NjxA /%NjxB) | Query cover (NjxA%/NjxB%) | Related products | References                                                    |
|-------------------------------------------------------------|-----------------------------|---------------------------|---------------------------|------------------|---------------------------------------------------------------|
| <i>Streptomyces</i> sp. strain ATCC 11861                   | VioB/VioK                   | 33/31                     | 84/87                     | viomycin         | Antimicrobial agents and chemotherapy, 2003, 47(9): 2823-2830 |
| <i>S. mutabilis</i> subsp. <i>capreolus</i> ATCC 23892      | CmnB/CmnK                   | 34/32                     | 82/98                     | capreomycin      | Applied and environmental microbiology, 2007, 73: 4162-4170   |
| <i>Bacillus thuringiensis</i> sub. <i>kurstaki</i> YBT-1520 | Zwa5A/Zwa5B                 | 30/30                     | 82/79                     | zwittermicin A   | FEBS letters, 2008, 582: 3125-3131                            |
| <i>Staphylococcus aureus</i> Newman                         | SbnA/SbnB                   | 31/27                     | 95/90                     | staphyloferrin B | Molecular microbiology, 2009 74: 594-608                      |

**Supplementary Table S3.** Sequences of primer pairs used in this study

| Target products                     | Primer sequences (5'-3')                     |
|-------------------------------------|----------------------------------------------|
| Homologous fragment of <i>pdaps</i> | <u>CGGAATTC</u> CCAACCGGCTCGCCCACCACCTCAT    |
|                                     | GAT <u>AAGCTT</u> CCTCGAACAGGTGCGTCTGCAAGCT  |
| Complete fragment of <i>pdaps</i>   | GTGACGGGCGGGACCGTCGCTGACCG                   |
|                                     | TCACCGTGCAGGACTGGTGGGGTGGG                   |
| <i>pdaps</i> with its own promotor  | <u>ATGGATCC</u> AGCGCCAGTTGTCCCAGTGGACCTC    |
|                                     | GAT <u>AAGCTT</u> TACCGTGCAGGACTGGTGGGGTG    |
| A domain of <i>pdaps</i>            | <u>CGGAATTC</u> GTGACGGGCGGGACCGTCGCTGA      |
|                                     | GAT <u>AAGCTT</u> GGACGTCGAGGAACGGCGGCACCATG |
| <i>njxA</i>                         | <u>CGGAATTC</u> GATGACCATCATCTCCGTTCCCA      |
|                                     | GAT <u>AAGCTT</u> TTCAGGCCGTCAGGTCCGTGGC     |
| <i>njxB</i>                         | <u>CGGAATTC</u> GGTGACCACCACACGTCCCGCC       |
|                                     | GAT <u>AAGCTT</u> TTCAGCCGTAGCGGCGTAGCTC     |

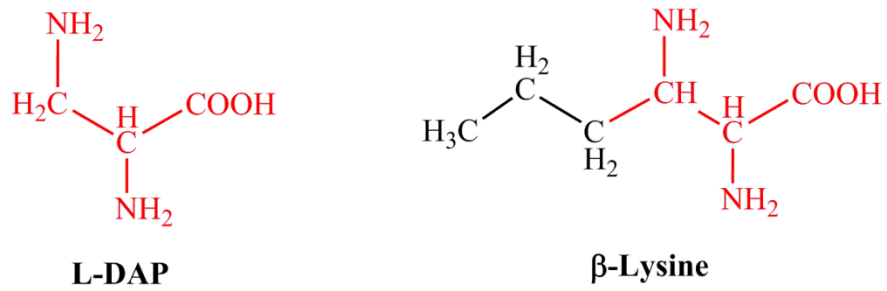

**Supplementary Fig. S1.** Structures of L-DAP and β-lysine

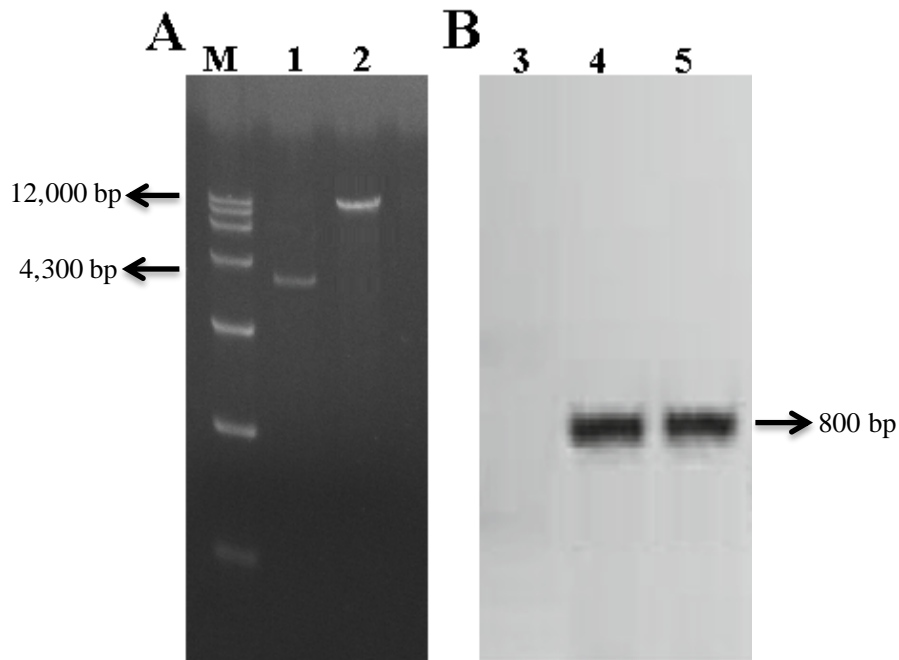

**Supplementary Fig. S2.** Analysis for putative *pdaps* disruption by PCR (A) and Southern-blot (B). For PCR analysis, the start and the end sequences of putative *pdaps* were used as primers for confirmation of the *pdaps* disruption. 1. using the chromosome of wild-type strain *S. albulus* PD-1 as the PCR template; 2. using the chromosome of putative *pdaps* disruption strain *S. albulus* PD-3 as a template. For Southern-blot analysis, the genomes were digested by *Sac*I and apramycin resistance gene was used as a probe. 4. wild-type strain *S. albulus* PD-1; 5 and 6. putative *pdaps* disruption strain *S. albulus* PD-3.

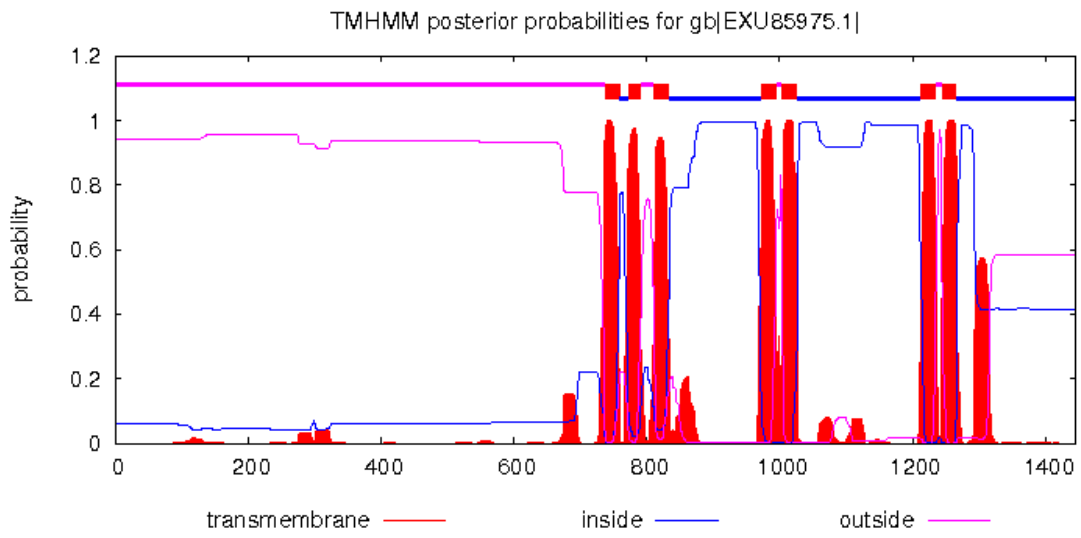

**Supplementary Fig. S3.** Analysis of transmembrane helices in PDAPs

## A

```

PDAPs_C1.seq .....YLRLLGAR
PDAPs_C2.seq CAKRLVLPRTIPVGTTHPVRSA LGVRRKWLSDKLLS S L T F T . . N S L Y A T L Y T V P W L R L L G A R
PDAPs_C3.seq . L K R L V I G R Y R P R T E P L W S W F V R R S E F V T G L Y E A A A V P V G L A P L T G T P F L P P A L R L F G A R
Consensus                               lrll gar

PDAPs_C1.seq I G P R T T I A T G V V P L P A L L R I G A D A A I G Y G V T L R A W R V A D G W V T V A P I D I G P R A Y V G A H A V
PDAPs_C2.seq I G P G A E V S T A A H L D P D L L T L L G E G S F V A D M A G V G G A T F A G G R V T C R R T E V G R R A F L G N A A Y
PDAPs_C3.seq I G R R T W L G T T F L T E F D L V D I G D D A A I G A G V S L Q T H L F E D R V M K M S K V T V Q A G A S V G S R S V
Consensus ig t l g a g v s l q t h l f e d r v m k m s k v t v q a g a s v g s r s v

PDAPs_C1.seq I L P G A R L A A G A G L G E Q S V V G Q G E V V P P G A R W A G S P P A P V P T L D P . . H V E D M L R A G G T T E H
PDAPs_C2.seq L P A G T R T G P G S L I G . V G T V P P G D D V P P G T S W L G S P A I R L P Q R Q S S G T F P E E L T F S P T R K A
PDAPs_C3.seq V L Y D G V V G E G V W L D A L S L V M K G E Y L T P G T A M R G I P V Q G L A L R V G . A R P S P E L T P H P T S P A
Consensus g v g p g w g p l t

PDAPs_C1.seq G R A R H V A A
PDAPs_C2.seq V R H R L A I E
PDAPs_C3.seq R . . . . .
Consensus

```

## B

```

PDAPs_C1.seq .....YLRLLGAR
Pls_C1.seq ALAARALACTIKPGAYPRGGATHLRRLWTAERVAFAFCVP...SLLGTEWARLYRSLG
PDAPs_C2.seq .CAKRLVLPRTIPVGTTHPVRSA LGVRRKWLSDKLLS S L T F T . . F T N S L Y A T L Y T V P W L R L L G A
Pls_C2.seq ..VRLLRG GIT PGLHPASGGVAVRAWLVTRLLDGARG..SLFPLYASLGTPHWRLLGA
PDAPs_C3.seq .. L K R L V I G R Y R P R T E P L W S W F V R R S E F V T G L Y E A A A V P V G L A P L T G T P F L P P A L R L F G A
Pls_C3.seq . L A K W L L V G R F T V S E H P L W S S F V W R N E L Y D T F V E S L A V P S M A G A F T G T P V L N W W L R L L G A
Consensus                               r g

PDAPs_C1.seq I G P R T T I A T G V V P L P A L L R I G A D A A I G Y G V T L R A W R V A D G W V T V A P I D I G P R A Y V G A H A
Pls_C1.seq A T G R N V A L H T . M P E V T G T A E L G D G C S V E P E A D I S G W W L D G D T L H I G A V R I G A G A R V A H R S
PDAPs_C2.seq R I G P G A E V S T A A H L D P D L L T L L G E G S F V A D M A G V G G A T F A G G R V T C R R T E V G R R A F L G N A A
Pls_C2.seq K V G R H A E I S T V L P L . P S L L H V E D G A F L A D D T L V A P F E L R G G W L R L G T V R I G R R A F V G N S G
PDAPs_C3.seq R I G R R T W L G T T F L T E F D L V D I G D D A A I G A G V S L Q T H L F E D R V M K M S K V T V Q A G A S V G S R S
Pls_C3.seq K I G R G V W L E S Y W L F E T D L I T V A D G V S V N R G C V L Q T H L F H D R I M R L D T V R L A E G S S L G P H G
Consensus g l

PDAPs_C1.seq V L P G A R L A A G A G L G E Q S V V G Q G E V V P P G A R W A G S P P A P V P T L D P H V E D M L R A G G T T E H G
Pls_C1.seq M L M P G A V V G Q G A E L A S G A C L D . . G E I P D G A S W S G S P A R P A G . . A A E R M A G A A W P A P A W Q R
PDAPs_C2.seq Y L P A G T R T G P G S L I G V G T V P P . G D D V P P G T S W L G S P A I R L P Q R Q S S G T F P E E L T F S P T R K
Pls_C2.seq I V D P G H D V P D H S L V G V L S N A P . A D G E P . G S S W L G R P A M P L P . R V A T Q A D P A R . T F A P P R R
PDAPs_C3.seq V V L Y D G V V G E G V W L D A L S L V M K G E Y L T P G T A M R G I P V Q G L A L R V G A R P S P E L T P H P T S P A
Pls_C3.seq I V L P G T E V G A R A S I A P S S L V M R G E S V P A H T R W A G N E I A G E R P . . . A R P V P A R A E G G A A A .
Consensus w g p

PDAPs_C1.seq R A R H V A A A
Pls_C1.seq S R R W S A A Y
PDAPs_C2.seq A V R H R L A I
Pls_C2.seq L V R A R A A V
PDAPs_C3.seq R . . . . .
Pls_C3.seq . . . . .
Consensus

```

**Supplementary Fig. S4.** (A) Alignment of the three tandem domains of PDAPs. (B) Alignment of the amino acid sequences between the tandem domains of PDAPs and Pls.

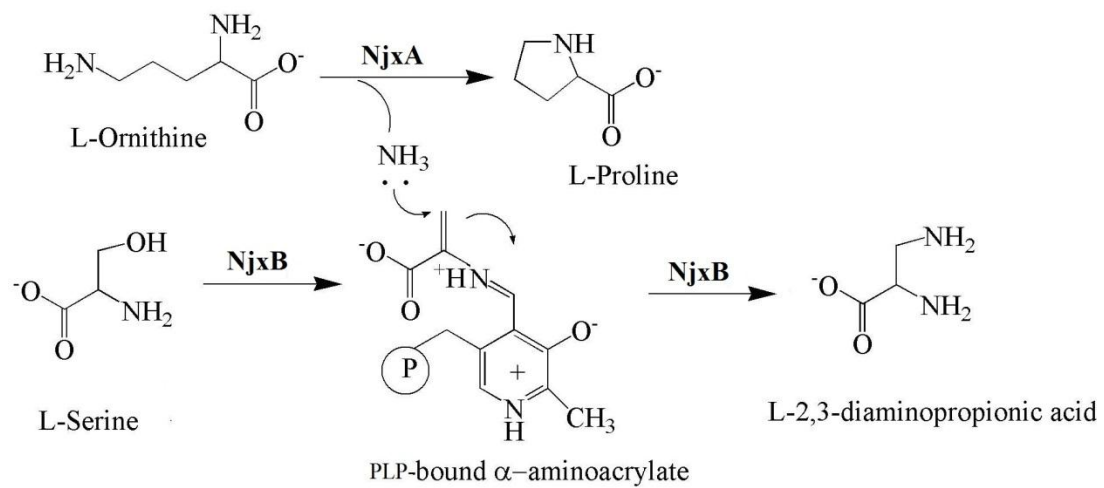

**Supplementary Fig. S5.** The putative synthesis mechanism of L-DAP in *S. albulus* PD-1.
